# Supplementary material for: Why Do Older Korean Adults Respond Differently to Activities of Daily Living and Instrumental Activities of Daily Living? A Differential Item Functioning Analysis
Source: PubMed Central journal article supplement — Ann Geriatr Med Res. 2019 Dec 30;23(4):197–203. doi: 10.4235/agmr.19.0047 (PMC7370754; doi:10.4235/agmr.19.0047), 2019-12-30
Supplement: agmr-19-0047-suppl.pdf [file agmr-19-0047-suppl.pdf]

**Table S1.** Summary of DIF results for measures of ADL and IADL in four previous and the present study

|                                            | Fleishman et al. <sup>15)</sup> | Teresi et al. <sup>23)</sup>   | Cabrero-Garcia et al. <sup>11)</sup>  | Niti et al. <sup>19)</sup>              | Present study                         |
|--------------------------------------------|---------------------------------|--------------------------------|---------------------------------------|-----------------------------------------|---------------------------------------|
| Purpose                                    | DIF by age, gender              | DIF by gender, age, race       | DIF by gender                         | DIF by gender, age, ethnicity, dementia | DIF by gender, age, educational level |
| Populations                                | US 18+ years (n = 5,750)        | US cancer patients (n = 1,714) | Spanish elderly 65+ years (n = 6,522) | Singaporean elderly (n = 1,079)         | Korean elderly (n = 4,164)            |
| <b>ADL</b>                                 |                                 |                                |                                       |                                         |                                       |
| Bathing                                    | ⊙                               | ●                              | ○                                     | X                                       | ○                                     |
| Dressing                                   | ⊙                               | ⊙                              | ○                                     | X                                       | ○                                     |
| Getting in/out of bed/chair (transferring) | ⊙                               | X                              | ○                                     | X                                       | ○                                     |
| Getting around inside                      | ○                               | X                              | ○                                     | ○                                       | X                                     |
| Using the toilet                           | ○                               | ⊙                              | ○                                     | X                                       | ○                                     |
| Eating & drinking                          | ⊙                               | ⊙                              | ○                                     | X                                       | ○                                     |
| Washing                                    | X                               | ⊙                              | X                                     | X                                       | ○                                     |
| Body position change                       | X                               | X                              | ○                                     | X                                       | X                                     |
| Help with incontinence                     | X                               | X                              | X                                     | X                                       | ○                                     |
| <b>IADL</b>                                |                                 |                                |                                       |                                         |                                       |
| Shopping                                   | ●⊙                              | X                              | ●                                     | ○                                       | ●⊙                                    |
| Doing light housework (household chores)   | ⊙                               | ⊙                              | ●                                     | ○                                       | ⊙                                     |
| Preparing meals                            | ⊙                               | X                              | ●                                     | ●⊙                                      | ●⊙                                    |
| Managing money                             | ⊙                               | X                              | X                                     | ○                                       | ●⊙                                    |
| Using the telephone                        | ●⊙                              | X                              | X                                     | ⊙                                       | ●⊙                                    |
| Caring for others                          | X                               | X                              | ●                                     | X                                       | X                                     |
| Walking outside                            | X                               | X                              | ○                                     | ○                                       | X                                     |
| Using public transportation                | X                               | X                              | ○                                     | X                                       | ●⊙                                    |
| Doing laundry                              | X                               | X                              | X                                     | ●                                       | ●⊙                                    |
| Taking medication                          | X                               | X                              | X                                     | ●                                       | ○                                     |
| Getting around outside                     | X                               | X                              | X                                     | X                                       | ●                                     |

DIF, differential item functioning; ADL, activities of daily living; IADL, instrumental activities of daily living; ○, no item-level bias; ●, item-level bias by gender; ⊙, item-level bias by age, race, ethnicity, or educational level; X, not investigated.
